# Supplementary material
Source: PubMed Central journal article supplement (PMC3234747)
Supplement: supp_M111.286351_jbc.M111.286351-1.pdf [file supp_M111.286351_jbc.M111.286351-1.pdf]

**Supplemental data for**

**INFLUENCE OF HEME-THIOLATE IN SHAPING THE CATALYTIC PROPERTIES OF  
A BACTERIAL NITRIC OXIDE SYNTHASE\***

**Luciana Hannibal, Ramasamy Somasundaram, Jesús Tejero, Adjele Wilson and Dennis J. Stuehr**

From the Department of Pathobiology, Lerner Research Institute,  
Cleveland Clinic, Cleveland, Ohio 44195 and Laboratoire stress oxidant et detoxication (LSOD),  
CEA-IBITEC-S, Saclay, France.

Running title: Role of a proximal Trp residue in catalysis by bsNOS

Address correspondence to: Dennis J. Stuehr, Department of Pathobiology (NC-22), Lerner  
Research Institute, The Cleveland Clinic Foundation, 9500 Euclid Ave., Cleveland, Ohio 44195.

Phone: 216-445-6950; Fax: 216-636-0104; E-mail: [stuehrd@ccf.org](mailto:stuehrd@ccf.org).

**Figure S1.** Purity and oligomeric state of bsNOS wt and W66 mutants.

**Figure S2.** Spectrophotometric titrations of L-Arg (upper panels) and NOHA (lower panels) and determination of the binding affinity constants,  $K_d$ .

**Figure S3.** Single turnover reactions with L-Arg and H<sub>4</sub>T of bsNOS wild type (A-C) and mutant proteins W66H (D-F) and W66F (G-I).

**Figure S4.** Single turnover reactions with NOHA and H<sub>2</sub>T for bsNOS wild type, and mutant proteins W66H and W66F.

**Figure S5.** HPLC chromatograms for the formation of [<sup>14</sup>C]-NOHA from [<sup>14</sup>C]-L-Arg under single turnover conditions, at infinite time (10 min).

**Table S1.** UV-vis absorption maxima of bsNOS and mutants W66H and W66F reconstituted with H<sub>4</sub>F/DTT and L-Arg or imidazole.

**Table S2.** Observed rate constants for the reactions of bsNOS, W66H and W66F in the presence of H<sub>2</sub>B with L-Arg as substrate.

**Table S3.** Observed rate constants for the reactions of bsNOS, W66H and W66F in the presence of H<sub>2</sub>T, with L-Arg or NOHA as substrates.

**Table S4.** Rates of Fe(II)O<sub>2</sub> complex conversion to Fe(III) of selected heme proteins.

**Table S5.** Maximum yields for the conversions of L-Arg to NOHA and NOHA to citrulline at infinite time by wild type and mutant *B. subtilis* NOSs in reactions performed with H<sub>4</sub>T.

**Table S6.** Oxidation rates of Fe(III)-NO complexes of selected heme proteins.

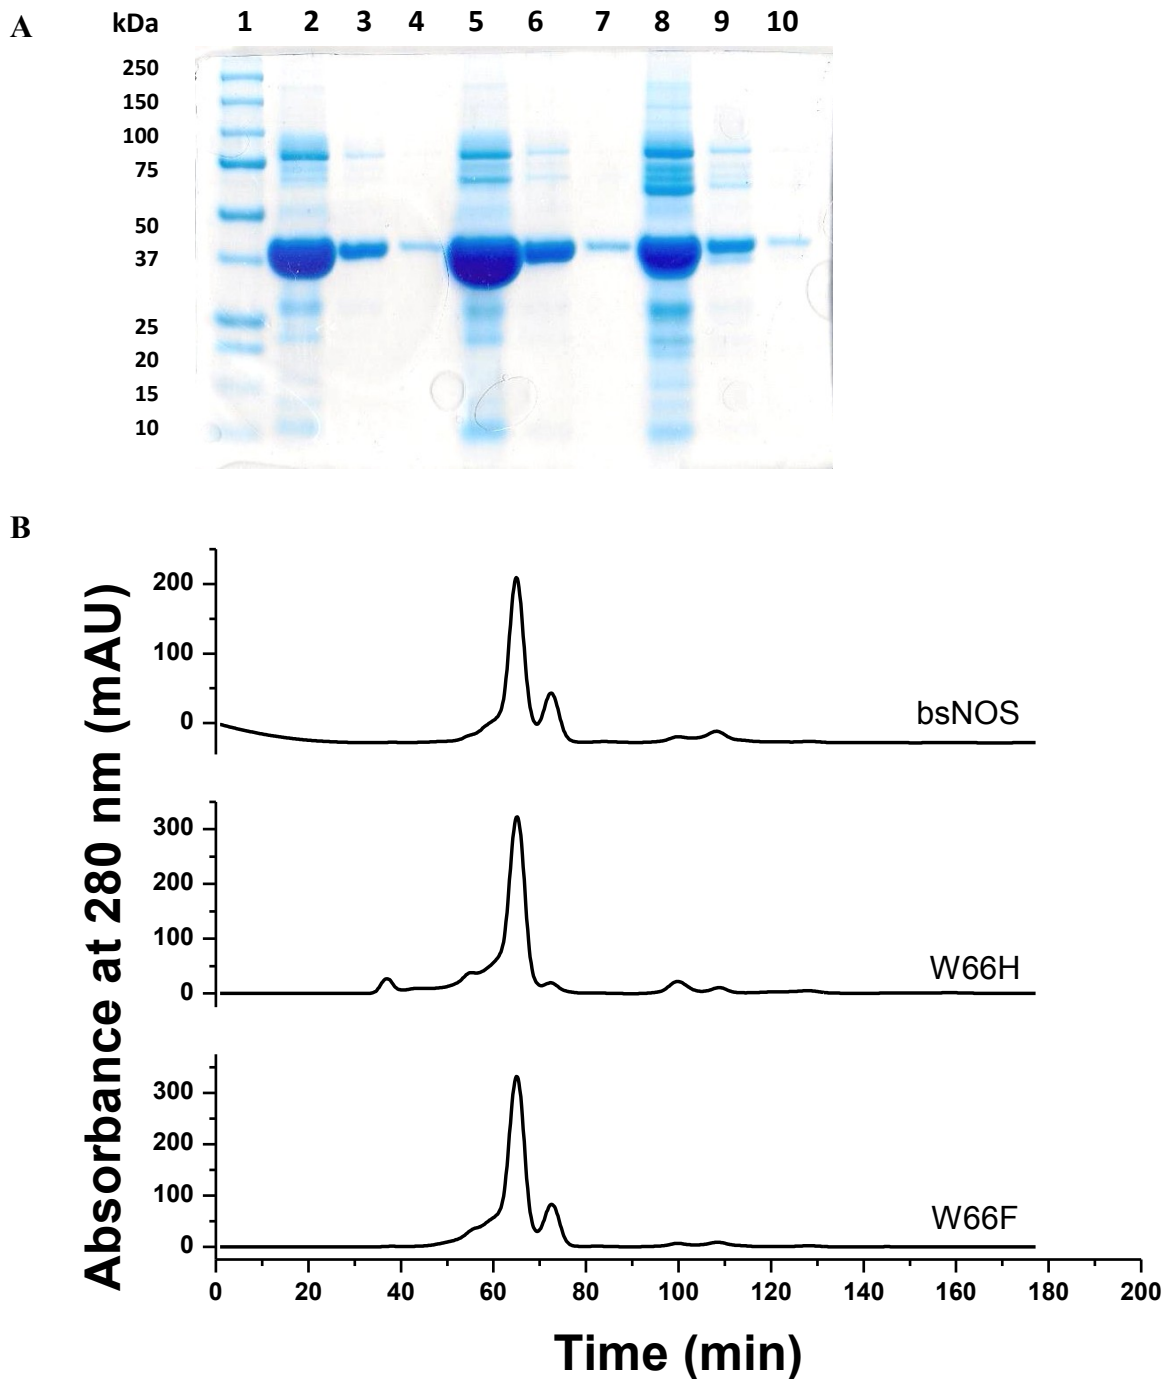

**Figure S1.** Purity and oligomeric state of bsNOS wt and W66 mutants. **A.** SDS-PAGE (10%) of bsNOS (lanes 2-4), W66F (lanes 5-7) and W66H (lanes 8-10). Serial dilutions (1:10 and 1:100) are shown. **B.** Size exclusion chromatography of bsNOS and W66 mutants reconstituted with L-Arg and H<sub>4</sub>T. Each protein (~ 150  $\mu$ M) was incubated for with 1 mM L-Arg, 400 mM H<sub>4</sub>T and 1.2 mM DTT for 10 min. The samples were run on a Superdex 200 column pre-equilibrated with buffer (40 mM EPPS, pH 7.6, 150 mM NaCl) containing 100  $\mu$ M L-Arg, 40  $\mu$ M H<sub>4</sub>T and 120  $\mu$ M DTT. Under these conditions (flow rate 0.2 mL/min), dimeric and monomeric NOS eluted at 65 and 73 min, respectively.

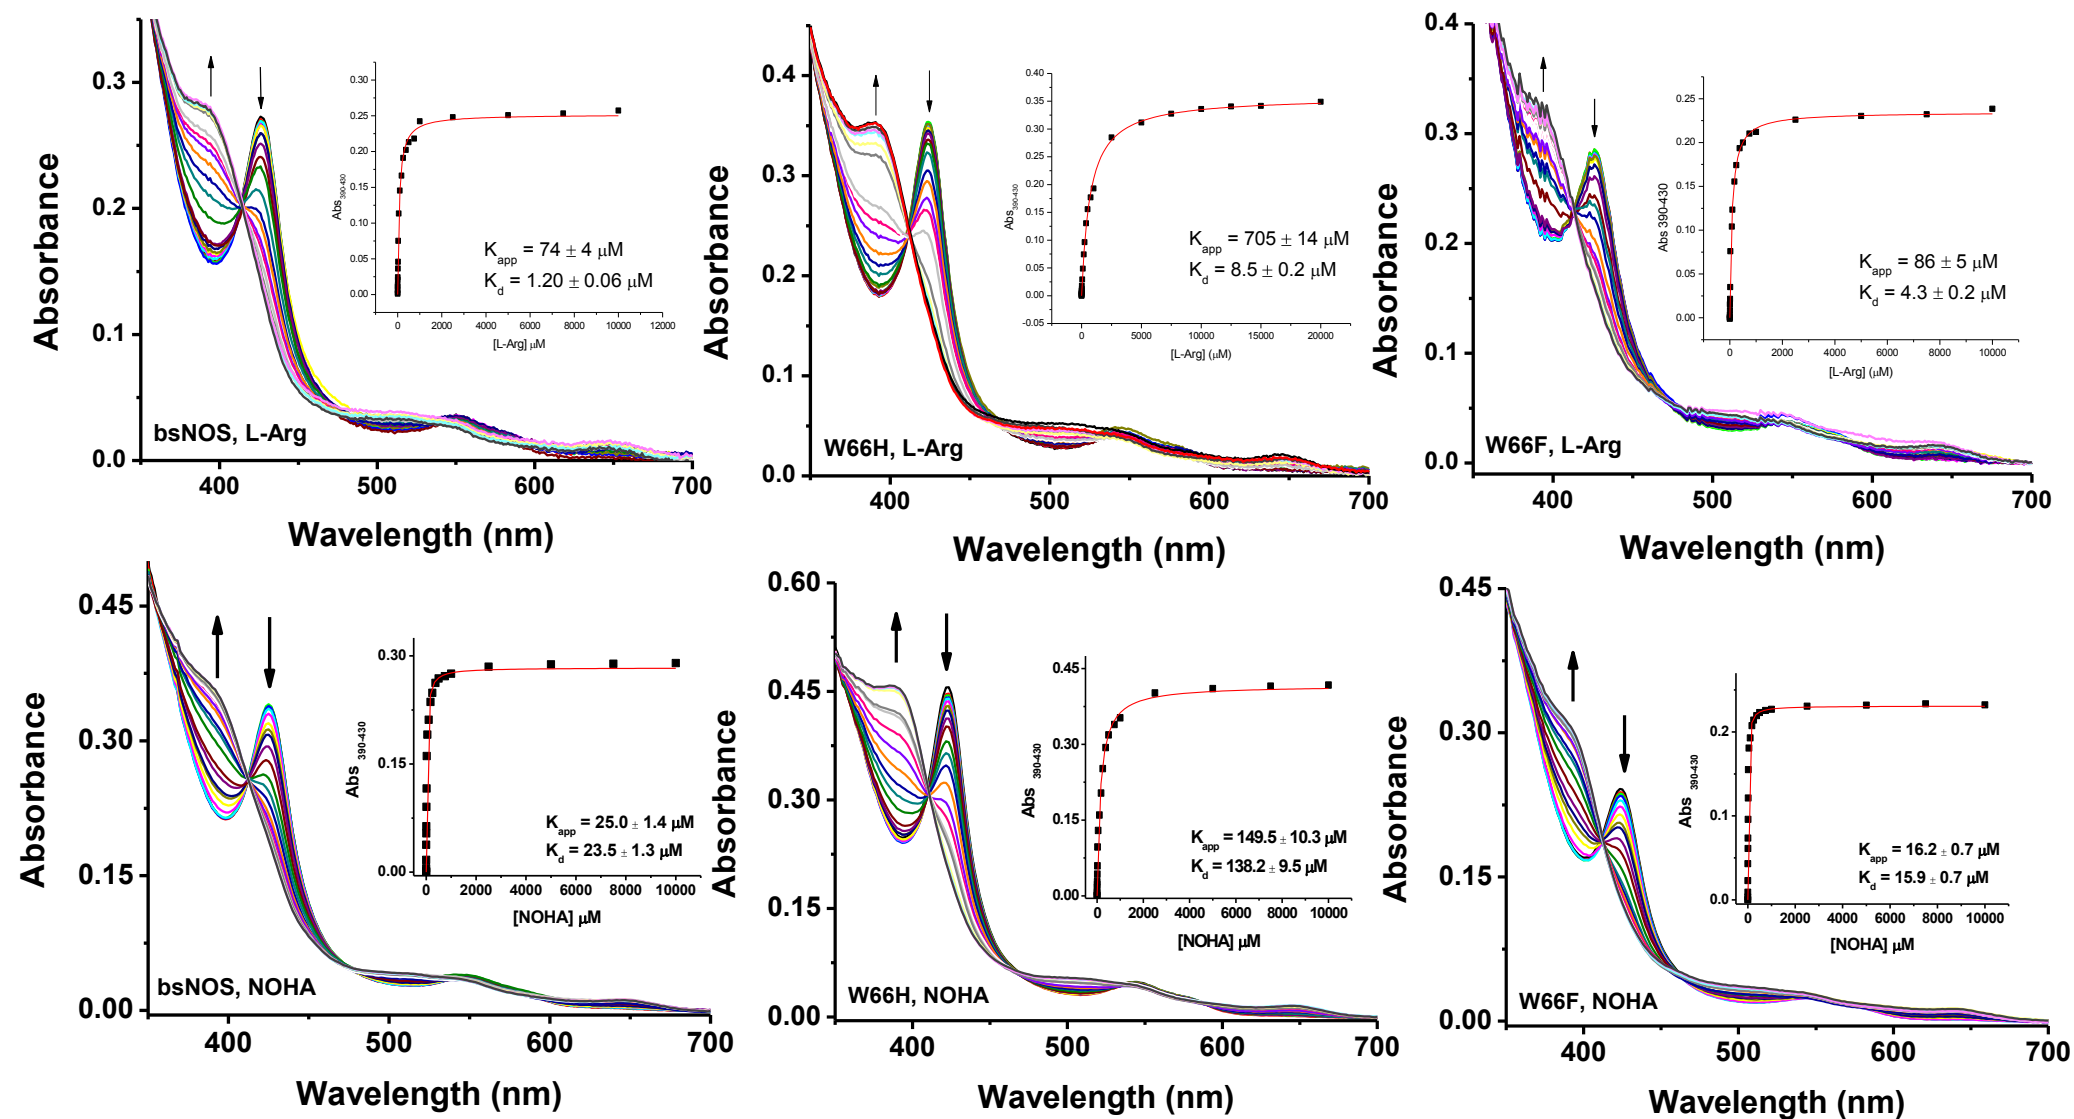

**Figure S2.** Spectrophotometric titrations of L-Arg (upper panels) and NOHA (lower panels) and determination of the binding affinity constants,  $K_d$ . W66H and W66F bsNOS display distinct substrate binding affinity with respect to wild type bsNOS. The titrations were performed in the presence of  $H_4T$  ( $50 \mu M$ ), in buffer EPPS ( $40 \text{ mM}$ ,  $\text{pH } 7.60$ ) containing  $150 \text{ mM NaCl}$  and  $10\%$  glycerol, at  $25 \text{ }^\circ\text{C}$ . Binding constants for L-Arg and NOHA were determined in the presence of  $10 \text{ mM}$  imidazole

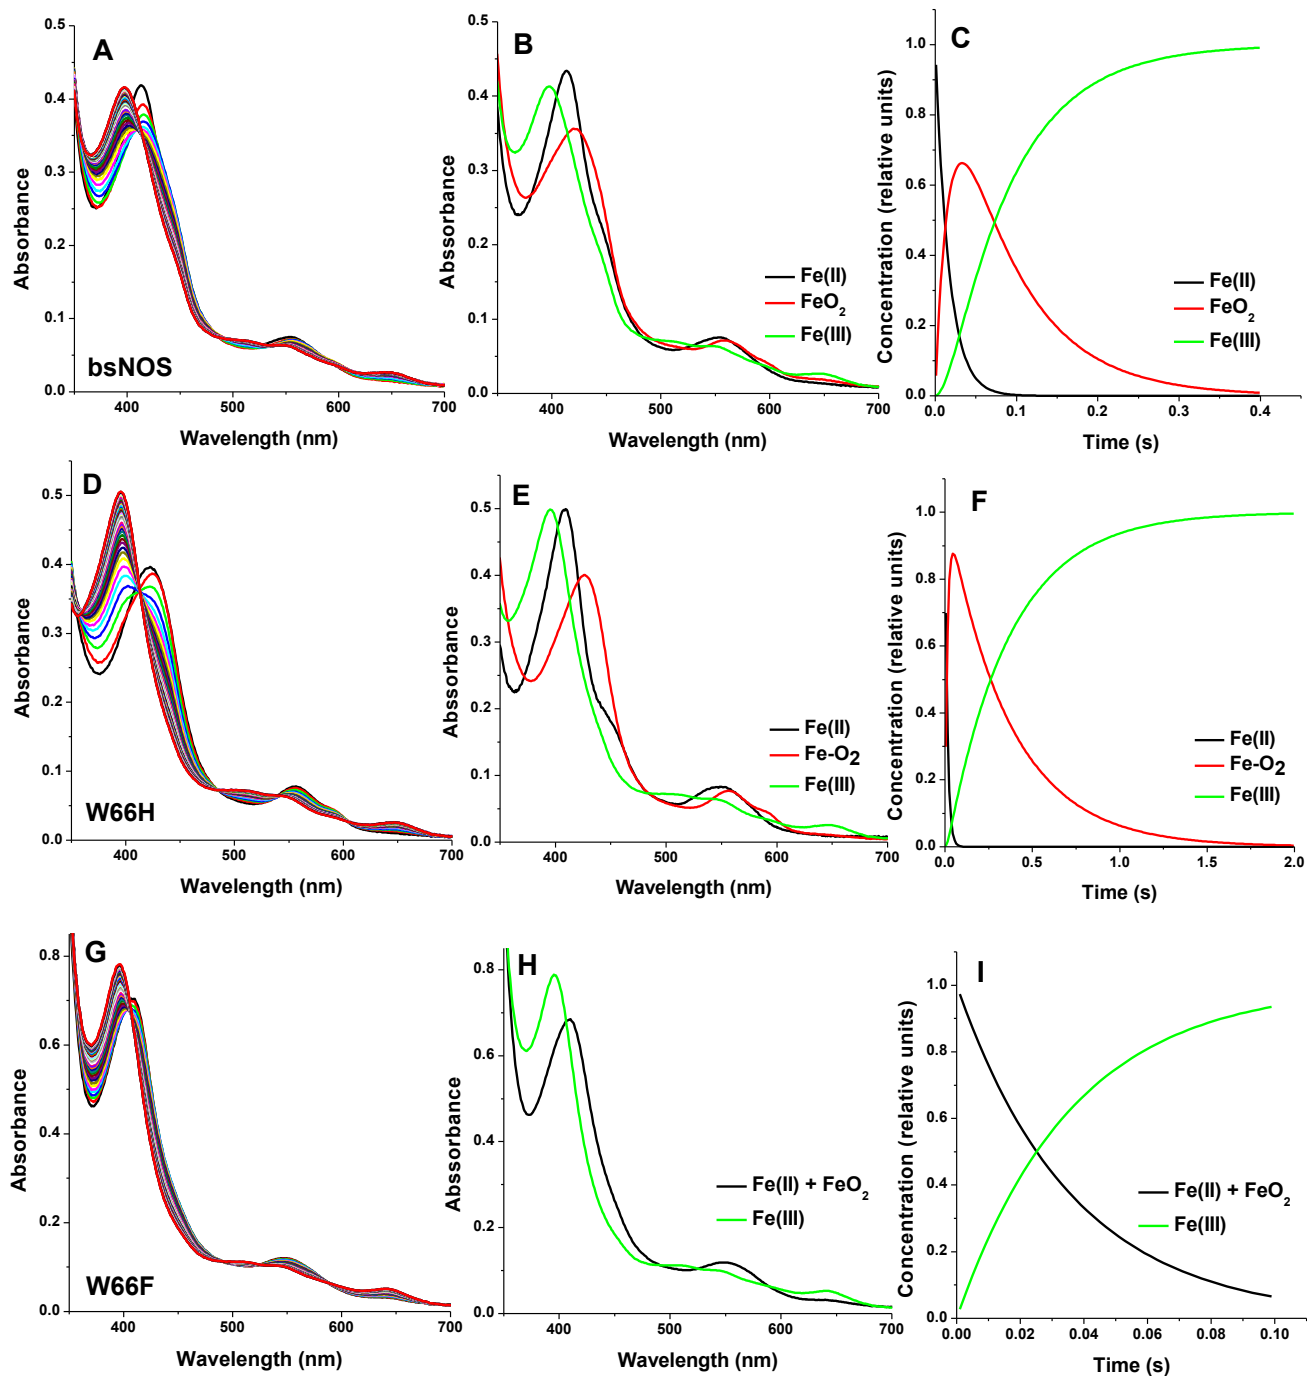

**Figure S3.** Single turnover reactions with L-Arg and H<sub>4</sub>T of bsNOS wild type (A-C) and mutant proteins W66H (D-F) and W66F (G-I). Three species were identified by global analysis using the SpecFit 3.0 software: Fe(II) (Soret peak ~412 nm), Fe-O<sub>2</sub> (Soret peak ~ 427 nm) and Fe(III) (Soret peak ~ 394 nm). Mutation of Trp<sup>66</sup> to His results in a slower conversion of the Fe(II)-O<sub>2</sub> species to form Fe(III) during single turnover reactions. Unlike the mammalian counterpart W188H iNOSoxy, decay of the Fe(II)-O<sub>2</sub> species in W66H occurs without the buildup of a detectable intermediate. Replacement of Trp<sup>66</sup> by Phe results in a faster conversion of the Fe(II)-O<sub>2</sub> species to form Fe(III), as depicted by the time courses of the different species with respect to wild type bsNOS.

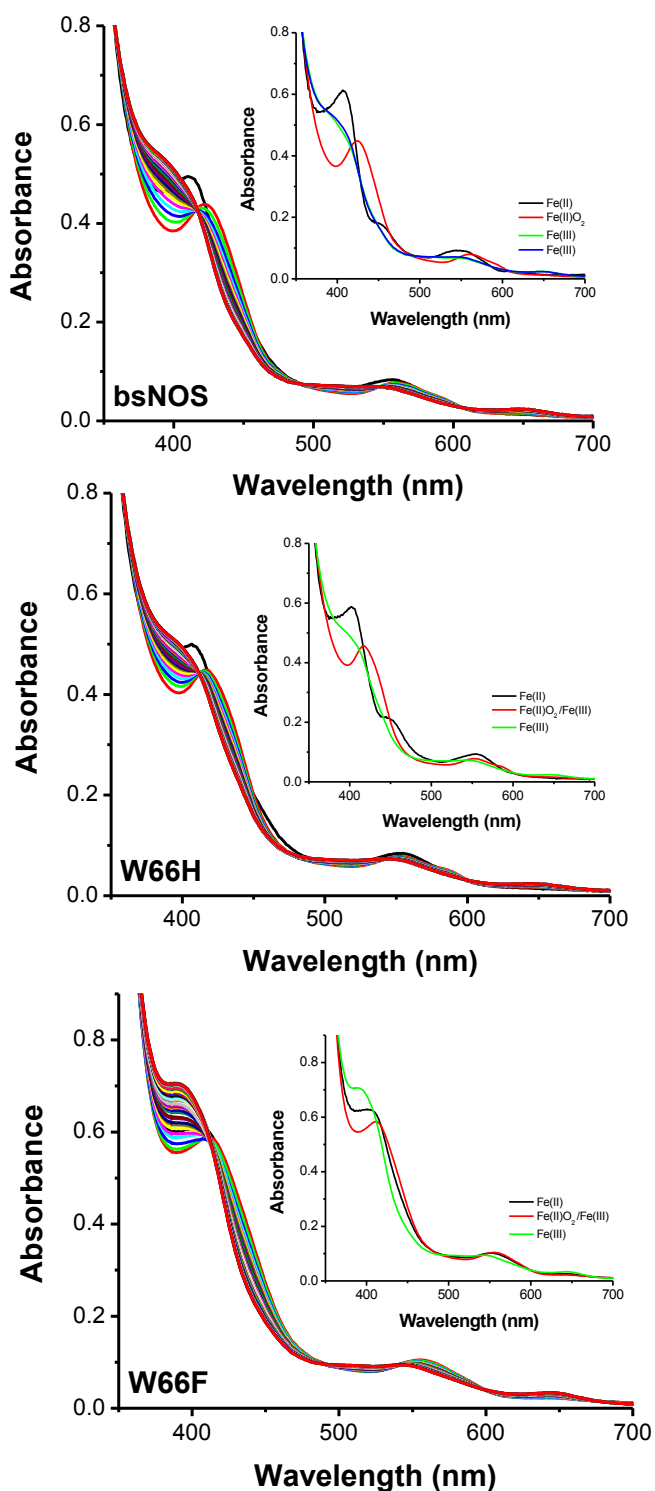

**Figure S4.** Single turnover reactions with NOHA and H<sub>2</sub>T for bsNOS wild type, and mutant proteins W66H and W66F. Three species were identified by global analysis using the SpecFit 3.0 software: Fe(II) (Soret peak ~412 nm), Fe-O<sub>2</sub> (Soret peak ~ 427 nm) and Fe(III) (Soret peak ~ 394 nm). The reaction of wild type bsNOS shown herein was fit to a three-exponential model to evaluate/rule out the formation of an Fe(II)-NO complex. No evidence for Fe(II)-NO formation was found under these experimental conditions. Note: The marked absorption around 360-380 nm is due to the strong yellow color of H<sub>2</sub>T.

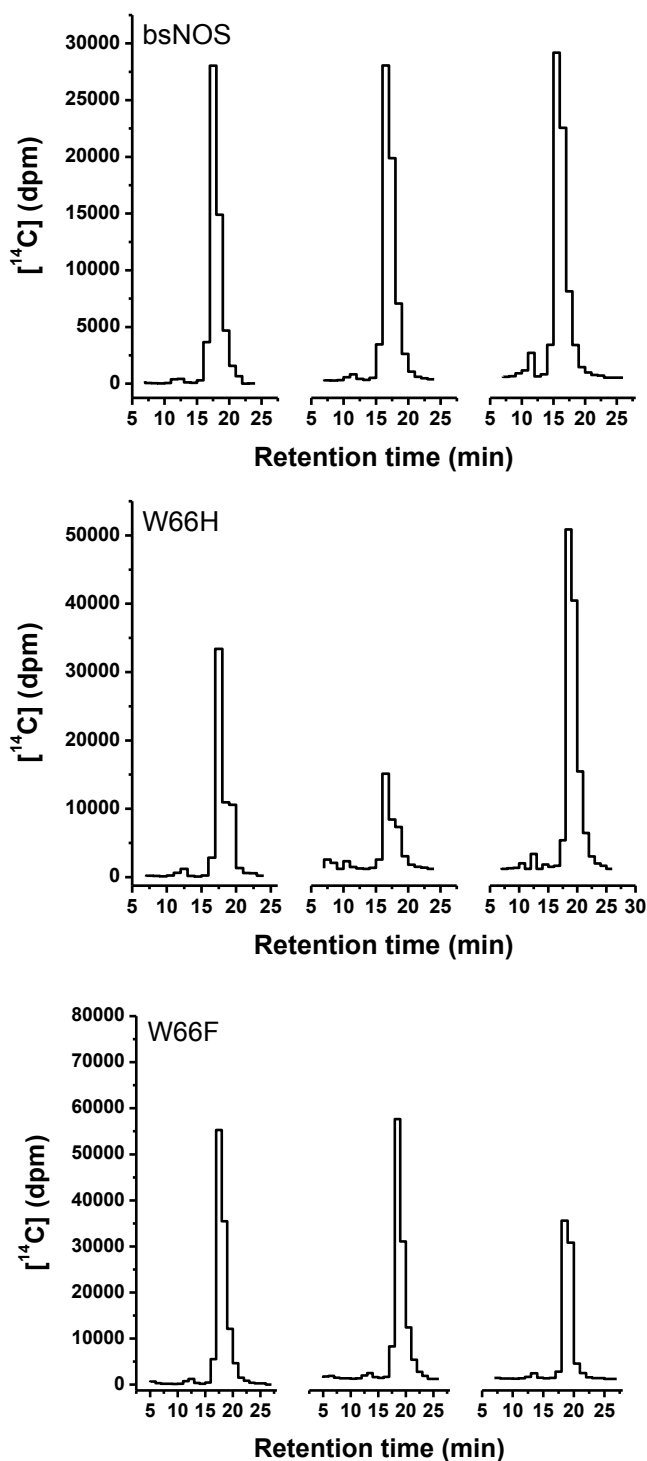

**Figure S5.** HPLC chromatograms for the formation of  $^{14}\text{C}$ -NOHA from  $^{14}\text{C}$ -L-Arg under single turnover conditions, at infinite time (10 min). Conversion of  $^{14}\text{C}$ -L-Arg to  $^{14}\text{C}$ -NOHA amounted to 2.71, 3.08 and 2.34 % of the total substrate, which resulted in a net conversion of 0.27, 0.31 and 0.23 NOHA per heme for bsNOS wt, W66H and W66F, respectively. The retention times for  $^{14}\text{C}$ -NOHA and  $^{14}\text{C}$ -L-Arg were  $\sim 13$  and 18 min, respectively. Three independent samples were analyzed for each protein. The error associated with these measurements was less than 10%.

**Table S1.** UV-vis absorption maxima of bsNOS and mutants W66H and W66F reconstituted with H<sub>4</sub>F/DTT (100 μM/300 μM) and L-Arg (1 mM) or imidazole (5 mM) in EPPS buffer (40 mM, pH 7.60) containing 150 mM NaCl and 10% glycerol.

|                                                                                                                   | Soret (nm)             | Visible (nm)  |
|-------------------------------------------------------------------------------------------------------------------|------------------------|---------------|
| <b><i>bsNOS, wt</i></b>                                                                                           |                        |               |
| Fe(III)                                                                                                           | 394                    | 509, 546, 649 |
| Fe(III)-Imid                                                                                                      | 426                    | 548           |
| Fe(II)                                                                                                            | 412                    | 554           |
| Fe(II)-CO                                                                                                         | 446                    | 554           |
| Fe(II)-NO                                                                                                         | 438                    | 567           |
| <b><i>W66H</i></b>                                                                                                |                        |               |
| Fe(III)                                                                                                           | 392                    | 506, 552, 648 |
| Fe(III)-Imid                                                                                                      | 424                    | 541           |
| Fe(II)                                                                                                            | 406                    | 555           |
| Fe(II)-CO                                                                                                         | 440                    | 554           |
| Fe(II)-NO                                                                                                         | 435                    | 562           |
| <b><i>W66F</i></b>                                                                                                |                        |               |
| Fe(III)                                                                                                           | 394                    | 506, 545, 643 |
| Fe(III)-Imid                                                                                                      | 426                    | 544           |
| Fe(II)                                                                                                            | 409                    | 552           |
| Fe(II)-CO                                                                                                         | 449 <sup>a</sup> , 420 | 557           |
| Fe(II)-NO                                                                                                         | 439                    | 569           |
| <sup>a</sup> The species at 449 nm shifts slowly to an uncharacterized species with absorption maximum at 420 nm. |                        |               |

**Table S2.** Observed rate constants for the reactions of bsNOS, W66H and W66F in the presence of H<sub>2</sub>B with L-Arg as substrate.

|       | $\text{Fe}^{(\text{II})} \xrightarrow{k_1} \text{FeO}_2 \xrightarrow{k_2} \text{Fe}^{(\text{III})}$ |                      |
|-------|-----------------------------------------------------------------------------------------------------|----------------------|
|       | <i>H<sub>2</sub>B / L-Arg</i>                                                                       |                      |
|       | <i>k<sub>1</sub></i>                                                                                | <i>k<sub>2</sub></i> |
| bsNOS | >200                                                                                                | 0.35                 |
| W66H  | >200                                                                                                | 0.34                 |
| W66F  | >200                                                                                                | 1.60                 |



**Table S3.** Observed rate constants for the reactions of bsNOS, W66H and W66F in the presence of H<sub>2</sub>T, with L-Arg or NOHA as substrates.

|                                            | $\text{Fe}^{(\text{II})} \xrightarrow{k_1} \text{FeO}_2 \xrightarrow{k_2} \text{Fe}^{(\text{III})}$ |                      |
|--------------------------------------------|-----------------------------------------------------------------------------------------------------|----------------------|
| <i>H<sub>2</sub>T / L-Arg</i> <sup>a</sup> |                                                                                                     |                      |
|                                            | <i>k<sub>1</sub></i>                                                                                | <i>k<sub>2</sub></i> |
| bsNOS                                      | 55                                                                                                  | 0.42                 |
| W66H                                       | 39                                                                                                  | 0.12                 |
| W66F                                       | 102                                                                                                 | 2.8                  |
| <i>H<sub>2</sub>T / NOHA</i> <sup>b</sup>  |                                                                                                     |                      |
|                                            | <i>k<sub>1</sub></i>                                                                                | <i>k<sub>2</sub></i> |
| bsNOS                                      | 33                                                                                                  | 0.71                 |
| W66H                                       | 24                                                                                                  | 0.97                 |
| W66F                                       | 65                                                                                                  | 1.47                 |

<sup>a,b</sup> Each value is an average of 5-10 measurements. The error associated to these measurements was 2-5 %.

**Table S4.** Rates of Fe(II)O<sub>2</sub> complex conversion to Fe(III) of selected heme proteins.

| Enzyme                          | Temperature | $k_{\text{obs}}$ (s <sup>-1</sup> ) | Reference |
|---------------------------------|-------------|-------------------------------------|-----------|
|                                 |             | Fe(II)O <sub>2</sub> decay          |           |
| iNOSoxy, H <sub>2</sub> B       | 10 °C       | 0.3                                 | (1)       |
| iNOSoxy W188H, H <sub>2</sub> B | 10 °C       | 0.0044                              | (1)       |
| nNOSoxy, no pterin              | 10 °C       | 0.14                                | (2)       |
| drNOS L-Arg, no pterin          | 10 °C       | 1.37                                | (3)       |
| drNOS, L-Arg, H <sub>2</sub> T  | 10 °C       | 0.1                                 | (4)       |
| drNOS, NOHA, H <sub>2</sub> T   | 10 °C       | 0.1                                 | (4)       |
| CYP101 w/ substrate             | 5-20 °C     | 0.0003-0.0043                       | (5)       |
| CYP108 w/ substrate             | 4-20 °C     | 0.0007-0.017                        | (5)       |
| CYP2A6 w/ substrate             | 23 °C       | 0.3                                 | (6)       |
| CYP2B4 w/ substrate             | 15 °C       | 0.09                                | (7)       |
| CYP11A1 w/ substrate            | 4 °C        | 0.01                                | (8)       |
| CYP3A4 w/ substrate             | 6 °C        | 0.37                                | (9)       |
| P450 BM3, wild type             | 15 °C       | 0.14                                | (10)      |
| P450 BM3, mutant F393H          | 15 °C       | 0.003                               | (10)      |
| P450 BM3, mutant F393W          | 15 °C       | 0.54                                | (10)      |
| P450 BM3, substrate-free        | 15 °C       | 0.089                               | (11)      |
| P450 BM3, arachidonate          | 15 °C       | 0.059                               | (11)      |
| Mutant F393H, substrate-free    | 15 °C       | 0.018                               | (11)      |
| Mutant F393H, arachidonate      | 15 °C       | 0.0013                              | (11)      |

**Table S5.** Maximum yields for the conversions of L-Arg to NOHA and NOHA to citrulline at infinite time by wild type and mutant *B. subtilis* NOSs in reactions performed with H<sub>4</sub>T.

|                    | <b>Yield (NOHA or citrulline per heme)<sup>a</sup></b> |      |      |
|--------------------|--------------------------------------------------------|------|------|
|                    | bsNOS                                                  | W66H | W66F |
| L-Arg to NOHA      | 0.27                                                   | 0.31 | 0.23 |
| NOHA to citrulline | 0.60                                                   | 0.58 | 0.59 |

<sup>a</sup> Three independent reactions were carried out for each protein. The error associated to these measurements was 5-10%.

**Table S6.** Oxidation rates of Fe(III)-NO complexes of selected heme proteins.

| Enzyme                      | Temperature | $k_{\text{obs}}$ ( $\text{s}^{-1}$ ) | Reference              |
|-----------------------------|-------------|--------------------------------------|------------------------|
|                             |             | Fe(II)NO oxidation                   |                        |
| gsNOS NOHA/H <sub>4</sub> B | 4 °C        | 0.040                                | (12)                   |
| bsNOS W66H                  | 10 °C       | 0.063                                | This work <sup>a</sup> |
| bsNOS                       | 10 °C       | 0.092                                | This work <sup>b</sup> |
| dNOSoxy                     | 10 °C       | 0.093                                | (13)                   |
| nNOSoxy                     | 10 °C       | 0.19                                 | (14)                   |
| eNOSoxy                     | 10 °C       | 0.63                                 | (15)                   |
| bsNOS W66F                  | 10 °C       | 1.17                                 | This work <sup>c</sup> |
| W409F nNOSoxy               | 10 °C       | 1.3                                  | (14)                   |
| iNOSoxy                     | 10 °C       | 3.11                                 | (16)                   |

<sup>a, b, c</sup> Each value is an average of 5-10 measurements. The error associated to these measurements was 2-5%.

## Reference list

1. Tejero, J., Biswas, A., Wang, Z. Q., Page, R. C., Haque, M. M., Hemann, C., Zweier, J. L., Misra, S., and Stuehr, D. J. (2008) *J Biol Chem* **283**, 33498-33507
2. Abu-Soud, H. M., Gachhui, R., Raushel, F. M., and Stuehr, D. J. (1997) *J Biol Chem* **272**, 17349-17353
3. Adak, S., Bilwes, A. M., Panda, K., Hosfield, D., Aulak, K. S., McDonald, J. F., Tainer, J. A., Getzoff, E. D., Crane, B. R., and Stuehr, D. J. (2002) *Proc Natl Acad Sci U S A* **99**, 107-112
4. Reece, S. Y., Woodward, J. J., and Marletta, M. A. (2009) *Biochemistry* **48**, 5483-5491
5. Montgomery, H. J., Dupont, A. L., Leivo, H. E., and Guillemette, J. G. (2010) *Biochem Res Int* **2010**, 489892
6. Tejero, J., Biswas, A., Haque, M. M., Wang, Z. Q., Hemann, C., Varnado, C. L., Novince, Z., Hille, R., Goodwin, D. C., and Stuehr, D. J. (2010) *Biochem J* **433**, 163-174
7. Matsumura, H., Wakatabi, M., Omi, S., Ohtaki, A., Nakamura, N., Yohda, M., and Ohno, H. (2008) *Biochemistry* **47**, 4834-4842
8. Hume, R., Kelly, R. W., Taylor, P. L., and Boyd, G. S. (1984) *Eur J Biochem* **140**, 583-591
9. Denisov, I. G., Grinkova, Y. V., Baas, B. J., and Sligar, S. G. (2006) *J Biol Chem* **281**, 23313-23318
10. Ost, T. W., Clark, J., Mowat, C. G., Miles, C. S., Walkinshaw, M. D., Reid, G. A., Chapman, S. K., and Daff, S. (2003) *J Am Chem Soc* **125**, 15010-15020
11. Clark, J. P., Miles, C. S., Mowat, C. G., Walkinshaw, M. D., Reid, G. A., Daff, S. N., and Chapman, S. K. (2006) *J Inorg Biochem* **100**, 1075-1090
12. Sudhamsu, J., and Crane, B. R. (2006) *J Biol Chem* **281**, 9623-9632
13. Ray, S. S., Tejero, J., Wang, Z. Q., Dutta, T., Bhattacharjee, A., Regulski, M., Tully, T., Ghosh, S., and Stuehr, D. J. (2007) *Biochemistry* **46**, 11857-11864
14. Adak, S., Wang, Q., and Stuehr, D. J. (2000) *J Biol Chem* **275**, 17434-17439
15. Santolini, J., Meade, A. L., and Stuehr, D. J. (2001) *J Biol Chem* **276**, 48887-48898
16. Wang, Z. Q., Wei, C. C., and Stuehr, D. J. (2010) *J Inorg Biochem* **104**, 349-356
